# Supplementary material
Source: publisher figshare collection journal article supplement (https://karger.figshare.com/ndownloader/files/13077935)
Supplement: Supplementary file 1 [file 13077935]

**Online Suppl. Material**

As a 1.5 fold increase in Cr results in a 33.3% fall in GFR rather than 25% as originally laid out in the RIFLE classification, we applied the 33.3% fall in KeGFR criterion to our dataset to detect AKI. There were 22 episodes of AKI by this empirical criterion i.e. 9 less than with the 25% threshold. All of these nine episodes were detected by AKIN and 8 of these episodes had AKI as per RIFLE.

When the RIFLE criterion was then changed and applied as a > 33.3% fall in MDRD GFR, there were 48 episodes of RIFLE-AKI (54 by the original criterion).
